# Supplementary material for: Tree shoot bending generates hydraulic pressure pulses: a new long-distance signal?
Source: PubMed Central journal article supplement (PMC3991735; doi:10.1093/jxb/eru045), 2014-02-20
Supplement: supp_eru045_jexbot107284_file002.pdf [file supp_eru045_jexbot107284_file002.pdf]

Tree shoot bending generates hydraulic pressure pulses: a new long distance signal?

Rosana Lopez, Eric Badel, Sebastien Peraudeau, Nathalie Leblanc-Fournier, Francois Beaujard, Jean-Louis Julien, Hervé Cochard, and Bruno Mouliá

**SUPPLEMENTARY TABLE:**

Supplementary Table S1. F-values for repeated measures analysis of variance of the magnitude of the signal, half-time of recovery, volume of water involved in each step of the bending process and maximum longitudinal strain. ns, not significant, \* $P < 0.05$ , \*\* $P < 0.01$ , \*\*\* $P < 0.001$ .

| Magnitude of the signal            |           | Recovery time                      |         | Volume                             |           |
|------------------------------------|-----------|------------------------------------|---------|------------------------------------|-----------|
| Between-subjects effects           |           | Between-subjects effects           |         | Between-subjects effects           |           |
| Species                            | 2.64 ns   | Species                            | 3.83 *  | Species                            | 3.84 *    |
| Radius <sup>2</sup>                | 20.08 *** | Radius <sup>2</sup>                | 1.17 ns | Radius <sup>2</sup>                | 21.42 *** |
| Within-subjects effects            |           | Within-subjects effects            |         | Within-subjects effects            |           |
| Displacement                       | 3.04 *    | Displacement                       | 0.30 ns | Displacement                       | 0.16 ns   |
| Displacement *species              | 3.21 **   | Displacement *species              | 2.21 *  | Displacement *species              | 4.53 ***  |
| Displacement * Radius <sup>2</sup> | 1.90 ns   | Displacement * Radius <sup>2</sup> | 2.65 ns | Displacement * Radius <sup>2</sup> | 6.13 **   |
